# Supplementary material
Source: Springer Nature journal article supplement (https://www.springermedizin.de/resource/supplementary/13051_2010_187_MOESM7_ESM.pdf/9670122)

floor of mouth/tongue; 10

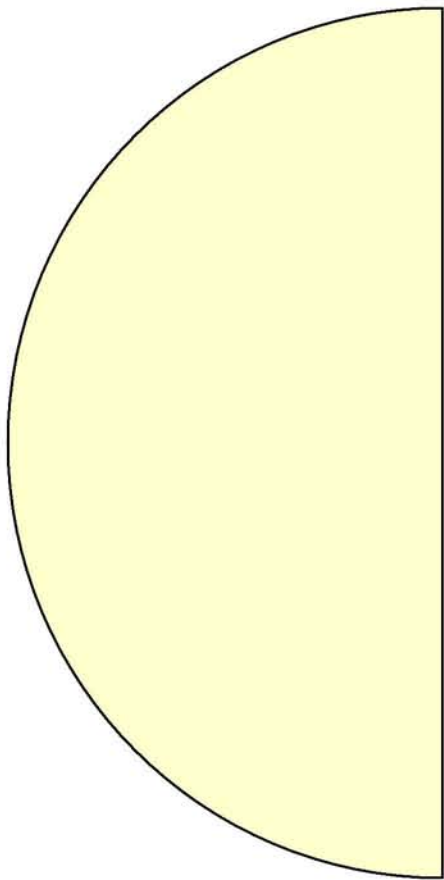

lateral mandible; 6

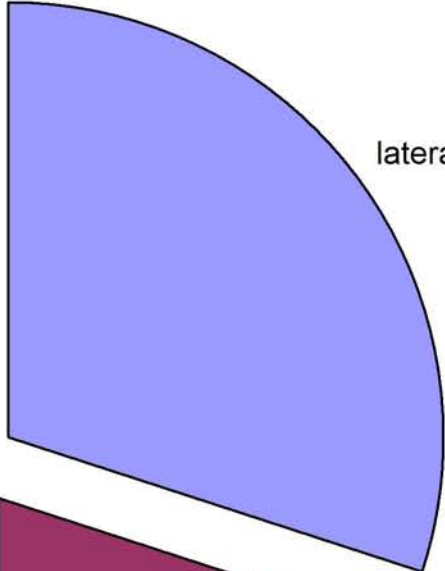

anterior mandible; 4

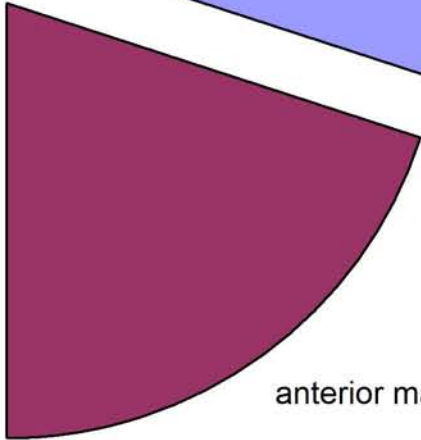

Supplement: MOESM7 [file 9670122]
